# Supplementary material
Source: PubMed Central journal article supplement (PMC3578556)
Supplement: ismej2012120x1.pdf [file ismej2012120x1.pdf]

## Supplemental Data

### A. Supporting Tables

**Table S1** The effect of elevated O<sub>3</sub> and cultivars on the soil and plant properties analyzed by ANOVA

**Table S2** The number of detected genes and their  $\alpha$ -diversity, and evenness of rhizosphere microbial communities from Yannong 19 (Y19) and Yangmai 16 (Y16) wheat cultivars at aO<sub>3</sub> and eO<sub>3</sub> conditions

**Table S3** Significantly changed genes with O<sub>3</sub> and wheat cultivar analyzed by ANOVA

**Table S4** Effects of elevated O<sub>3</sub> and wheat cultivars on the abundances of key functional genes involved in N cycling analyzed by ANOVA

**Table S5** Effects of elevated O<sub>3</sub> and wheat cultivars on the abundances of key functional genes involved in S and P cycling analyzed by ANOVA

### B. Supporting Figures

**Fig. S1** The ratios of fungi to bacteria and archaea to bacteria based on the sum of the signal intensities detected by GeoChip 3.0

**Fig. S2** The number and abundance of detected *gyrB* genes (A) and DCA analysis of phylogenetic structure (B) of microbial communities of Yannong 19 and Yangmai 16 wheat cultivars under aO<sub>3</sub> and eO<sub>3</sub>

**Table S1** The effect of elevated O<sub>3</sub> and cultivars on the soil and plant properties analyzed by ANOVA.

| Soil or plant variable   | O <sub>3</sub> |               | Cultivar |               | O <sub>3</sub> x Cultivar |         |
|--------------------------|----------------|---------------|----------|---------------|---------------------------|---------|
|                          | F value        | P value       | F value  | P value       | F value                   | P value |
| pH                       | 6.814          | <b>0.0311</b> | 0.033    | 0.8612        | 0.061                     | 0.8117  |
| Microbial biomass carbon | 0.047          | 0.8340        | 1.687    | 0.2300        | 3.355                     | 0.1040  |
| Dissolved organic carbon | 15.215         | <b>0.0045</b> | 7.189    | <b>0.0279</b> | 1.439                     | 0.2646  |
| Total carbon (TC)        | 1.054          | 0.3350        | 1.419    | 0.2680        | 1.419                     | 0.2680  |
| Total nitrogen (TN)      | 0.299          | 0.5990        | 1.166    | 0.3120        | 0.454                     | 0.5190  |
| C/N ratio (CNR)          | 0.142          | 0.7160        | 0.273    | 0.6150        | 0.486                     | 0.5060  |
| TC-grain                 | 15.949         | <b>0.0040</b> | 0.108    | 0.75068       | 2.121                     | 0.1834  |
| TN-grain                 | 0.267          | 0.6190        | 1.902    | 0.2050        | 2.484                     | 0.1540  |
| CNR-grain                | 0.498          | 0.5000        | 3.159    | 0.1130        | 1.933                     | 0.2020  |
| TC-straw                 | 6.211          | <b>0.0374</b> | 3.169    | 0.1129        | 0.014                     | 0.9085  |
| TN-straw                 | 3.691          | 0.091         | 0.923    | 0.3650        | 2.700                     | 0.1390  |
| CNR-straw                | 3.032          | 0.1200        | 0.430    | 0.5300        | 2.810                     | 0.1320  |
| Panicle length           | 0.617          | 0.4550        | 0.137    | 0.7210        | 3.238                     | 0.1100  |
| Grain weight             | 12.110         | <b>0.0083</b> | 7.672    | <b>0.0243</b> | 0.000                     | 0.9958  |
| Plant weight             | 1.645          | 0.2360        | 0.888    | 0.3740        | 0.023                     | 0.8840  |
| Straw-root weight        | 2.740          | 0.1360        | 0.383    | 0.5530        | 1.567                     | 0.2460  |

**Table S2** The number of detected genes and their  $\alpha$ -diversity, and evenness of rhizosphere microbial communities from Yannong 19 and Yangmai 16 wheat cultivars at aO<sub>3</sub> and eO<sub>3</sub> conditions.

|                                    | C-Y19                    | C-Y16                    | O-Y19                    | O-Y16                    |
|------------------------------------|--------------------------|--------------------------|--------------------------|--------------------------|
| No. of detected genes              | 1901±224.5               | 2120±369.2               | 1998±203.3               | 2061±170.8               |
| Archaea                            | 70.1±10.1                | 76.3±17.1                | 76.7±11.4                | 76.3±6.7                 |
| Bacteria                           | 1498±298.2               | 1674±324.1               | 1573±280.7               | 1612±219.7               |
| Fungi                              | 101.7±35.1               | 111±25.9                 | 88.7±13.6                | 100.7±21.0               |
| Shannon index (H')                 | 7.26±0.235               | 7.35±0.197               | 7.24±0.149               | 7.32±0.132               |
| Simpson's reciprocal index (1 / D) | 1074±313.5               | 1177±199.5               | 985±155.9                | 1087±148.4               |
| Simpson evenness                   | 0.718±0.148 <sup>a</sup> | 0.686±0.241 <sup>a</sup> | 0.614±0.147 <sup>c</sup> | 0.652±0.173 <sup>b</sup> |

C-Y19: O<sub>3</sub>-sensitive wheat cultivar at aO<sub>3</sub>; C-Y16: O<sub>3</sub>-relatively sensitive wheat cultivar at aO<sub>3</sub>; O-Y19: O<sub>3</sub>-sensitive wheat cultivar at eO<sub>3</sub>; O-Y16: O<sub>3</sub>-relatively sensitive at eO<sub>3</sub>. The significance was tested by the Student t-test at  $p < 0.05$ .

**Table S3** Significantly changed genes with O<sub>3</sub> and wheat cultivar analyzed by ANOVA.

| Gene or enzyme    | Functional process    | O <sub>3</sub>    |               | Cultivar |               | O <sub>3</sub> :Cultivar |               |
|-------------------|-----------------------|-------------------|---------------|----------|---------------|--------------------------|---------------|
|                   |                       | F value           | P value       | F value  | P value       | F value                  | P value       |
| SMR               | Antibiotic resistance | 0.3109            | 0.5773        | 7.1749   | <b>0.0075</b> | 2.1681                   | 0.1412        |
| <i>fhs</i> /FTHFS | Acetogenesis          | 7.8243            | <b>0.0054</b> | 0.0052   | 0.9426        | 0.0508                   | 0.8218        |
| Exoglucanase      | C degradation         | 0.1699            | 0.6806        | 5.2054   | <b>0.0236</b> | 0.0972                   | 0.7555        |
| <i>limEH</i>      |                       | 3.3607            | 0.0774        | 4.7885   | <b>0.0372</b> | 0.5504                   | 0.4643        |
| <i>lip</i>        |                       | 0.0275            | 0.8685        | 0.0317   | 0.8591        | 3.9740                   | <b>0.0486</b> |
| <i>aclB</i>       | C fixation            | 0.7601            | 0.3962        | 4.5182   | <b>0.0495</b> | 0.1080                   | 0.7467        |
| CODH              |                       | 0.2341            | 0.6287        | 7.2823   | <b>0.0073</b> | 3.5637                   | 0.0598        |
| <i>chrA</i>       | Metal resistance      | 0.0548            | 0.8150        | 5.5815   | <b>0.0183</b> | 1.3816                   | 0.2401        |
| <i>corC</i>       |                       | 7.6562            | <b>0.0071</b> | 0.0619   | 0.8042        | 0.1088                   | 0.7425        |
| <i>copA</i>       |                       | 0.2675            | 0.6051        | 6.3048   | <b>0.0121</b> | 1.6811                   | 0.1949        |
| <i>nifH</i>       | Nitrogen fixation     | 0.4097            | 0.5222        | 4.0418   | <b>0.0445</b> | 2.5435                   | 0.1109        |
| <i>pimF</i>       | Organic remediation   | 0.2207            | 0.6386        | 4.4700   | <b>0.0347</b> | 3.7838                   | 0.0520        |
| <i>pobA</i>       |                       | 1.5717            | 0.2108        | 9.3416   | <b>0.0024</b> | 1.7187                   | 0.1907        |
| <i>alkH</i>       |                       | 0.0026            | 0.9960        | 0.7324   | 0.3936        | 5.0641                   | <b>0.0260</b> |
| <i>chnB</i>       |                       | 0.0377            | 0.8463        | 1.6780   | 0.1976        | 4.4957                   | <b>0.0360</b> |
| ALN               |                       | 2.6850            | 0.1399        | 5.8526   | <b>0.0419</b> | 0.5333                   | 0.4860        |
| <i>dsrA</i>       |                       | Sulfite reduction | 0.6436        | 0.4226   | 3.9130        | <b>0.0482</b>            | 2.8688        |

**Table S4** Effects of elevated O<sub>3</sub> and wheat cultivars on the abundances of key functional genes involved in N cycling analyzed by ANOVA. Only genes with > 3 probes detected were shown.

| Gene or enzyme | Functional process        | O <sub>3</sub> (%) <sup>a</sup> |        | Cult. (%) <sup>b</sup> |                 | p-value <sup>c</sup> |               |                       |
|----------------|---------------------------|---------------------------------|--------|------------------------|-----------------|----------------------|---------------|-----------------------|
|                |                           | Y19                             | Y16    | aO <sub>3</sub>        | eO <sub>3</sub> | O <sub>3</sub>       | Cult.         | O <sub>3</sub> :cult. |
| <i>nifH</i>    | Nitrogen fixation         | 18.58                           | -6.11  | 29.97                  | 2.91            | 0.5222               | <b>0.0445</b> | 0.1109                |
| <i>amoA</i>    | Nitrification             | -20.32                          | -26.84 | 36.34                  | 25.20           | 0.3613               | 0.3654        | 0.7940                |
| <i>narG</i>    | Denitrification           | 20.73                           | -8.53  | 43.99                  | 9.09            | 0.8238               | 0.1480        | 0.3845                |
| <i>nirK</i>    |                           | 5.86                            | -5.38  | 7.17                   | -4.21           | 0.9972               | 0.9164        | 0.6531                |
| <i>nirS</i>    |                           | 18.14                           | -14.20 | 46.49                  | 6.39            | 0.9453               | 0.1635        | 0.3151                |
| <i>norB</i>    |                           | 25.64                           | -1.39  | 36.24                  | 6.93            | 0.7196               | 0.4973        | 0.6773                |
| <i>nosZ</i>    |                           | 24.47                           | -22.88 | 40.47                  | -12.96          | 0.9093               | 0.7176        | 0.4008                |
| <i>nirA</i>    |                           | Assimilatory N reduction        | 35.04  | -22.75                 | 44.51           | -17.33               | 0.9709        | 0.7225                |
| <i>nirB</i>    | 8.87                      |                                 | -4.07  | 20.30                  | 6.01            | 0.9405               | 0.6138        | 0.7957                |
| <i>nasA</i>    | 56.40                     |                                 | 3.30   | 54.19                  | 1.83            | 0.3710               | 0.4064        | 0.4551                |
| <i>napA</i>    | Dissimilatory N reduction | -61.67                          | -33.00 | -33.16                 | 16.82           | 0.0989               | 0.5972        | 0.4336                |
| <i>nrfA</i>    |                           | 3.52                            | -18.71 | 36.10                  | 6.87            | 0.6576               | 0.3831        | 0.5583                |
| <i>gdh</i>     | Ammonification            | 177.15                          | -42.73 | -25.52                 | -84.61          | 0.8592               | 0.1662        | 0.6703                |
| <i>ureC</i>    |                           | -7.94                           | -22.71 | 19.24                  | 0.11            | 0.1637               | 0.4413        | 0.4462                |
| <i>hzo</i>     | Anammox                   | 15.76                           | -8.44  | 38.80                  | 9.78            | 0.9301               | 0.2789        | 0.5516                |

a: Percent change by elevated O<sub>3</sub> was calculated using the following formula:  $(eO_3 - aO_3) * 100 / aO_3$ , where aO<sub>3</sub> and eO<sub>3</sub> were the average signal intensities of genes detected by GeoChip 3.0 at ambient O<sub>3</sub> or elevated O<sub>3</sub>, respectively. b: Percentage change by cultivar is calculated using the following formula:  $(cult_{Y16} - cult_{Y19}) * 100 / cult_{Y19}$  under aO<sub>3</sub> or eO<sub>3</sub> conditions; c: p values based on ANOVA analysis using the model:  $Y \sim O_3 + cultivar + O_3:cultivar$ .

**Table S5** Effects of elevated O<sub>3</sub> and wheat cultivars on the abundances of key functional genes involved in S and P cycling analyzed by ANOVA. Only genes with > 3 probes detected were shown.

| Gene or enzyme | Functional process     | O <sub>3</sub> (%) <sup>a</sup> |        | Cult. (%) <sup>b</sup> |                 | p-value <sup>c</sup> |               |                       |
|----------------|------------------------|---------------------------------|--------|------------------------|-----------------|----------------------|---------------|-----------------------|
|                |                        | Y19                             | Y16    | aO <sub>3</sub>        | eO <sub>3</sub> | O <sub>3</sub>       | Cult.         | O <sub>3</sub> :cult. |
| Phytase        | Phosphorus utilization | -1.87                           | -27.46 | 74.29                  | 28.85           | 0.9326               | 0.6415        | 0.5178                |
| <i>ppk</i>     |                        | 29.38                           | -11.05 | 56.08                  | 7.31            | 0.8320               | 0.2531        | 0.4158                |
| <i>ppx</i>     |                        | 24.66                           | -15.65 | 43.90                  | -2.63           | 0.9417               | 0.1634        | 0.1056                |
| <i>aprA</i>    | Sulfur metabolism      | 15.86                           | 0.43   | 24.22                  | 7.68            | 0.7463               | 0.5136        | 0.7624                |
| <i>dsrA</i>    | Sulfite reduction      | 25.85                           | -6.69  | 38.03                  | 2.34            | 0.4226               | <b>0.0482</b> | 0.0906                |
| <i>dsrB</i>    |                        | 9.86                            | -0.26  | 19.32                  | 8.32            | 0.8365               | 0.5388        | 0.8259                |
| <i>sox</i>     | Sulfur oxidation       | 9.96                            | -3.01  | 0.69                   | -11.19          | 0.9118               | 0.8528        | 0.8354                |

a: Percent change by elevated O<sub>3</sub> was calculated using the following formula:  $(eO_3 - aO_3) * 100 / aO_3$ , where aO<sub>3</sub> and eO<sub>3</sub> were the average signal intensities of genes detected by GeoChip 3.0 at ambient O<sub>3</sub> or elevated O<sub>3</sub>, respectively. b: Percentage change by cultivar is calculated using the following formula:  $(cult_{Y16} - cult_{Y19}) * 100 / cult_{Y19}$  under aO<sub>3</sub> or eO<sub>3</sub> conditions; c: p values based on ANOVA analysis using the model:  $Y \sim O_3 + cultivar + O_3: cultivar$ .

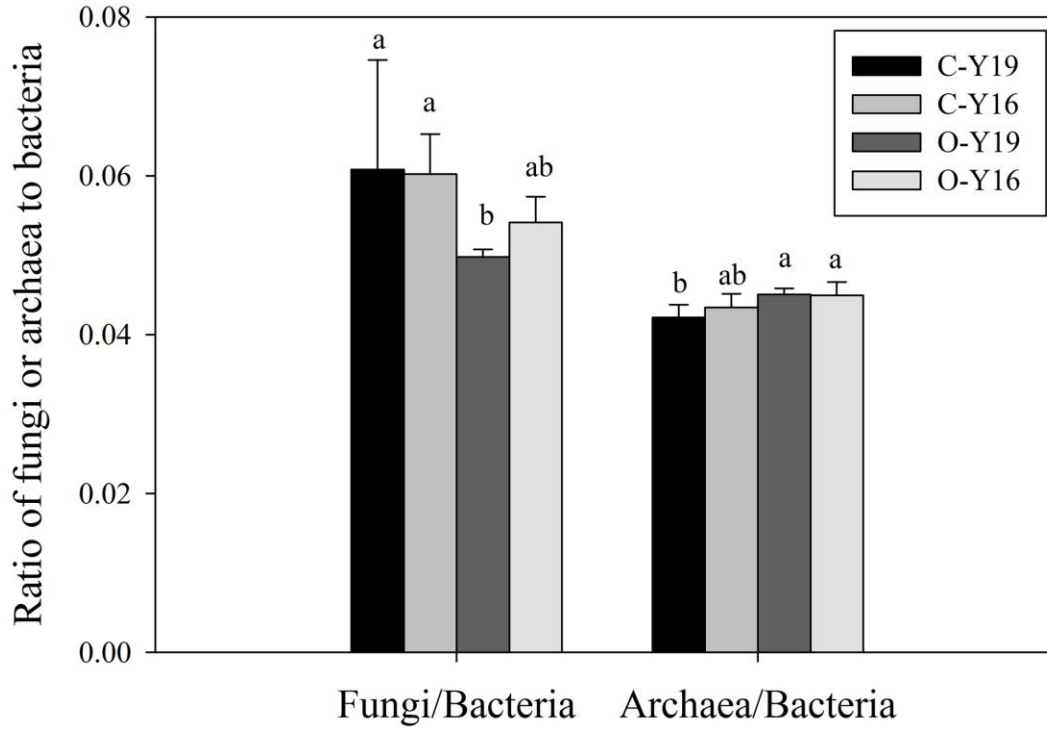

**Fig. S1** The ratios of fungi to bacteria and archaea to bacteria based on the sum of the signal intensities detected by GeoChip 3.0. The significance was tested by the Student t-test at  $p < 0.05$ . from  $O_3$ -sensitive and  $O_3$ -tolerant wheat cultivars at  $aO_3$  and  $eO_3$  conditions. C-Y19:  $O_3$ -sensitive wheat cultivar at  $aO_3$ ; C-Y16:  $O_3$ -relatively sensitive wheat cultivar at  $aO_3$ ; O-Y19:  $O_3$ -sensitive wheat cultivar at  $eO_3$ ; O-Y16:  $O_3$ -relatively sensitive at  $eO_3$ .

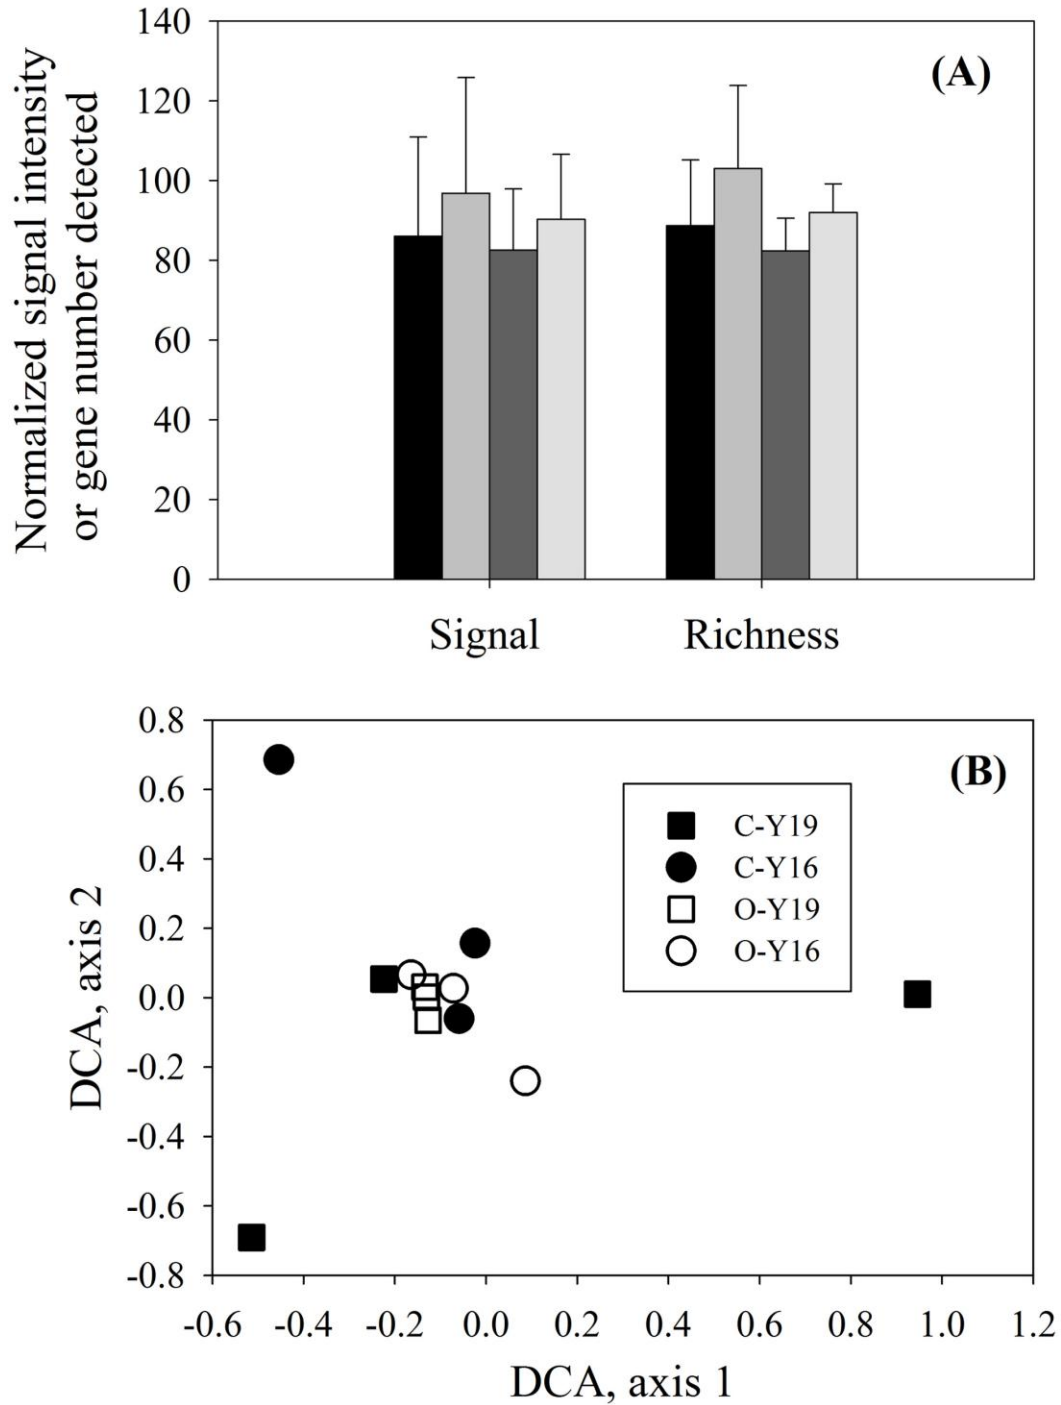

**Fig. S2** The number and abundance of detected *gyrB* genes (A) and DCA analysis of phylogenetic structure (B) of microbial communities of Yannong Y19 and Yangmai 16 wheat cultivars under aO<sub>3</sub> and eO<sub>3</sub>. C-Y19: O<sub>3</sub>-sensitive wheat cultivar at aO<sub>3</sub>; C-Y16: O<sub>3</sub>-relatively sensitive wheat cultivar at aO<sub>3</sub>; O-Y19: O<sub>3</sub>-sensitive wheat cultivar at eO<sub>3</sub>; O-Y16: O<sub>3</sub>-relatively sensitive at eO<sub>3</sub>.
